# Supplementary material for: Esterification of biomass-derived levulinic acid using molybdate-intercalated hydrotalcite materials
Source: Royal Society of Chemistry journal article supplement (doi:10.1039/d2nj03625h), 2022-01-01
Supplement: d2nj03625h1.pdf [file d2nj03625h1.pdf]

# **Esterification of Biomass-Derived Levulinic Acid Using Molybdate- Intercalated Hydrotalcite Materials**

**P. P. Neethu<sup>1</sup> and A. Sakthivel\*<sup>1</sup>**

*Inorganic Materials & Heterogeneous Catalysis Laboratory, Department of Chemistry,  
School of Physical Sciences, Central University of Kerala, Sabarmati Building, Tejaswini  
Hills, Periya P.O. Kasaragod 671320, Kerala, India.*

*Email: [sakthiveldu@gmail.com](mailto:sakthiveldu@gmail.com) / [sakthivelcuk@cukerala.ac.in](mailto:sakthivelcuk@cukerala.ac.in)*

**Electronic Supplementary Information**

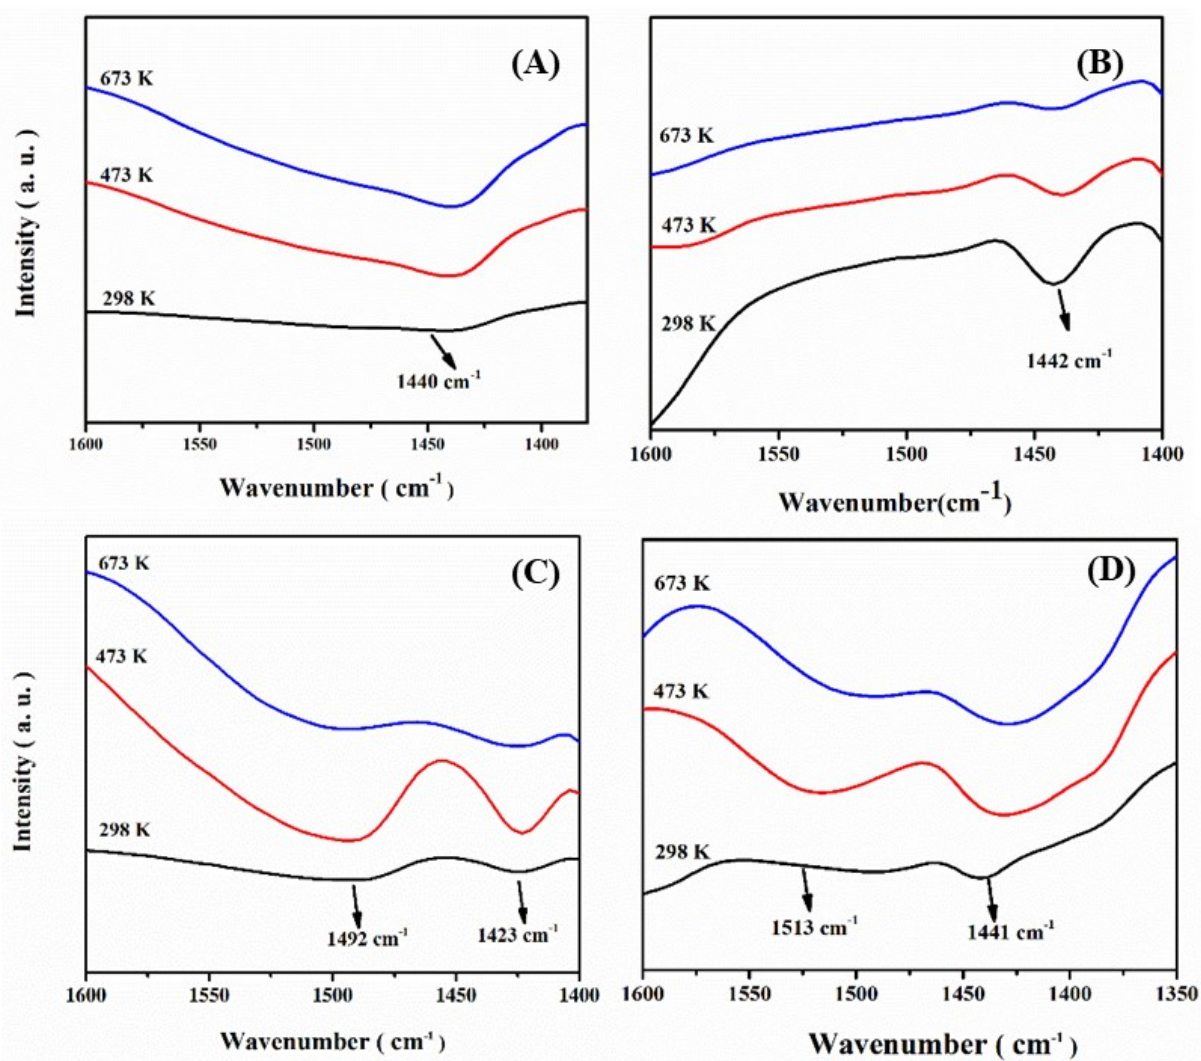

**Fig. S1.** Pyridine IR of (A) MgFe, (B) MgFeMo, (C) MgCr, and (D) MgCrMo.

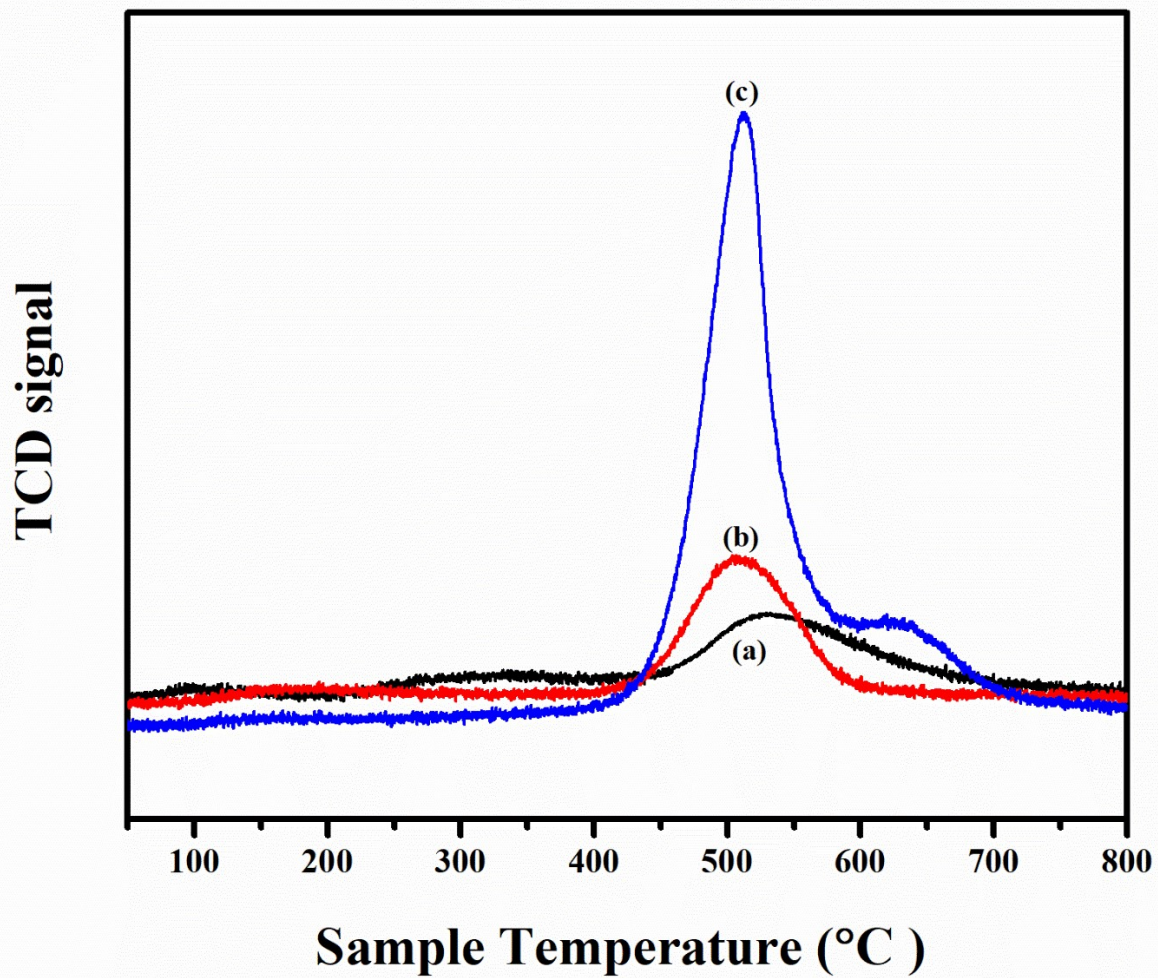

**Fig. S2.** CO<sub>2</sub> TPD of (a) MgFeMo (b) MgAlMo and (c) MgCrMo.

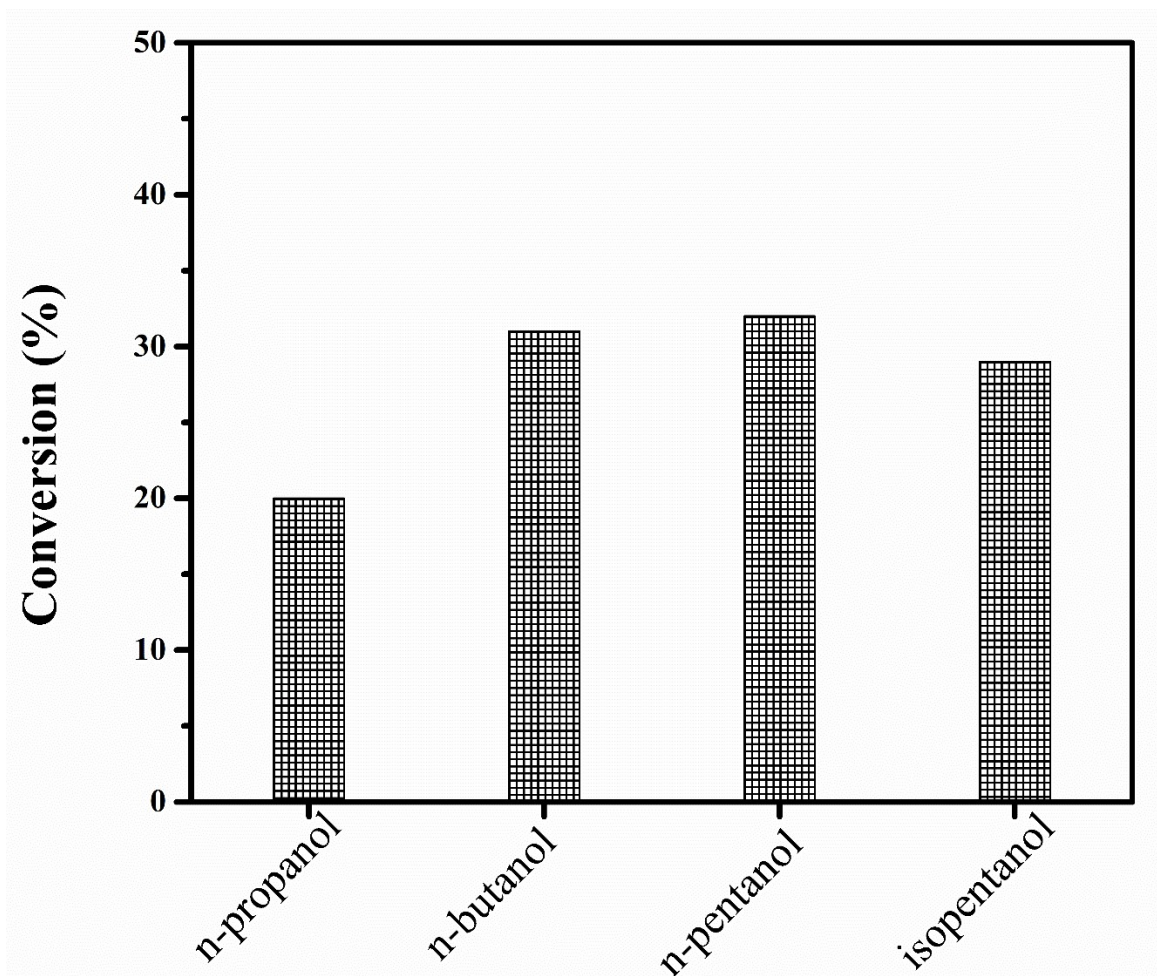

**Fig. S3.** Levulinic acid esterification using different alcohols without catalyst.

# Reaction conditions: 2 mmol levulinic acid, 10 mmol alcohol, 120°C, 5 hr.

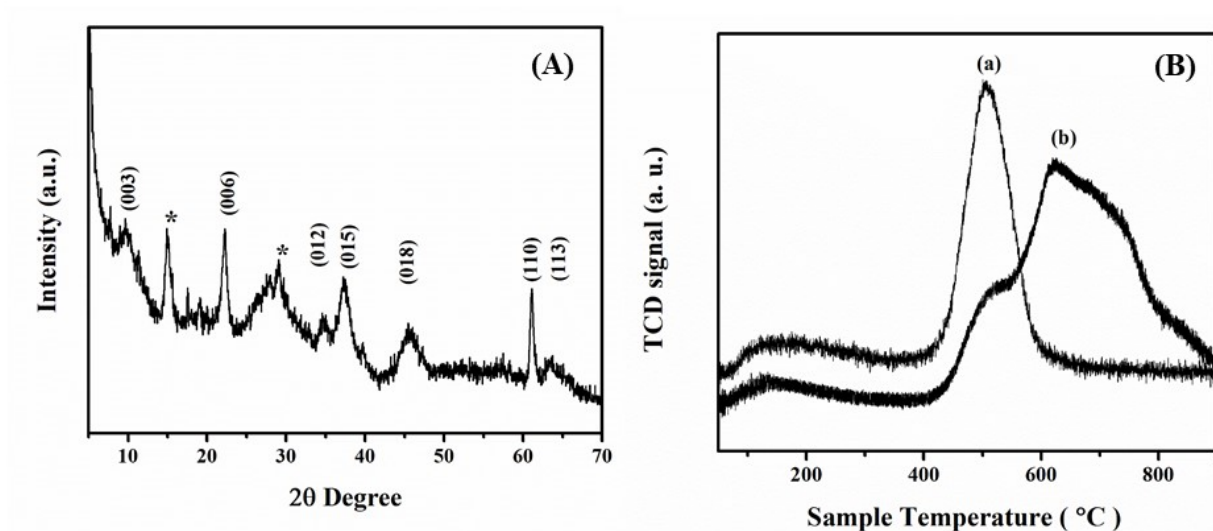

**Fig. S4.** (A) Powder XRD pattern of used MgAlMo; (B) NH<sub>3</sub> TPD of (a) fresh MgAlMo, and (b) used MgAlMo catalyst.

Table S1: Sizes of the crystal determined using Debye-Sherrer formula

| Sample | Crystallite size ( Å) |
|--------|-----------------------|
| MgFeMo | 19.2                  |
| MgAlMo | 45.2                  |
| MgCrMo | 36.7                  |
